# Supplementary material for: Alpha 1 Antitrypsin is an Inhibitor of the SARS-CoV-2-Priming Protease TMPRSS2
Source: PubMed Central journal article supplement — bioRxiv. 2020 Oct 7:2020.05.04.077826. Preprint. [Version 2] doi: 10.1101/2020.05.04.077826 (PMC7553163; doi:10.1101/2020.05.04.077826), 2020-10-07
Supplement: NIHPP2020.05.04.077826-supplement-1.pdf [file NIHPP2020.05.04.077826-supplement-1.pdf]

## Supplementary Information

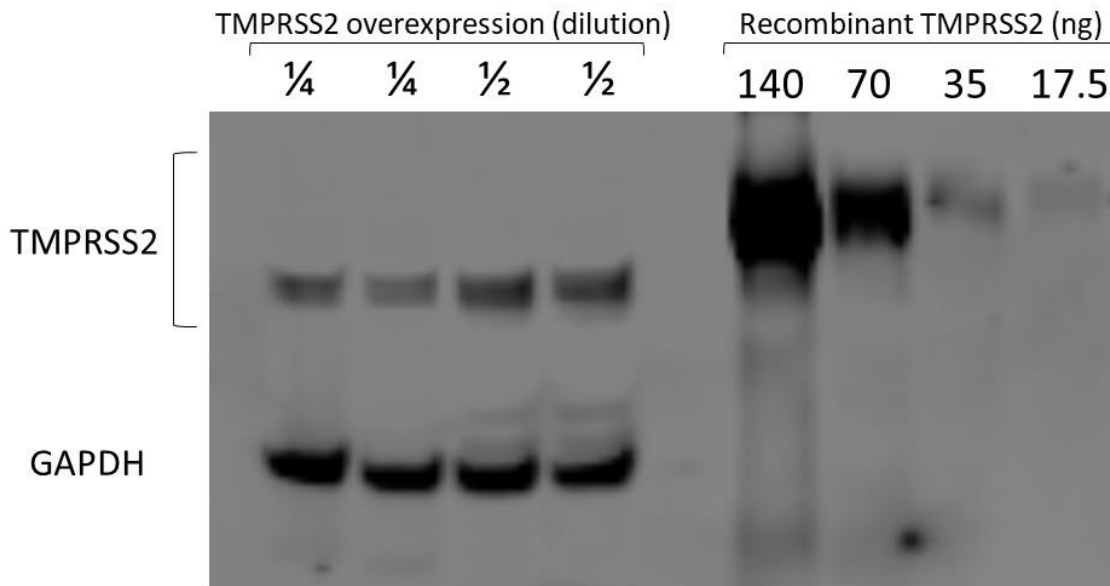

**Supplementary Figure 1. TMPRSS2 protein quantity calculation.** Western blot analysis of protein lysates from TMPRSS2-overexpressing cells (transfected HEK-293T) that were diluted  $\frac{1}{4}$  or  $\frac{1}{2}$  and of recombinant TMPRSS2 as indicated. GAPDH, glyceraldehyde-3-phosphate dehydrogenase; TMPRSS2, transmembrane serine protease 2.

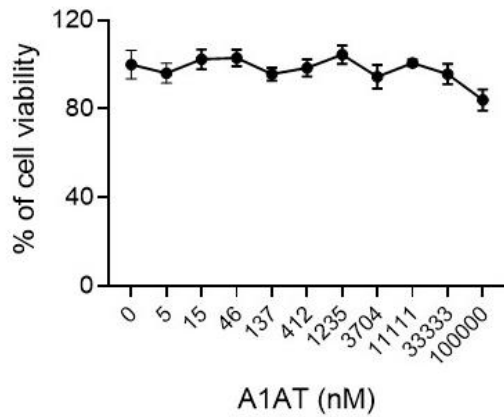

**Supplementary Figure 2. Viability assay.** HEK-293T cells were assessed according to their viability after 18 hours at the indicated concentrations of A1AT. Cell viability was calculated as the percent of viability compared to untreated cells. Results are presented as the mean  $\pm$  SE of 2 independent experiments performed in 6 replicates. A1AT, alpha 1 antitrypsin.

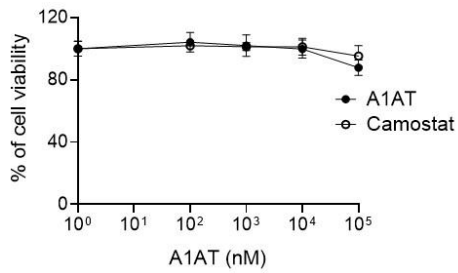

**Supplementary Figure 3. Viability assay of A1AT and camostat on SARS-CoV-2 genomic copies.** Caco-2 cells were assessed according to their viability at the indicated concentrations of A1AT. Cell viability was calculated as the percent of viability compared to untreated cells. Results are the mean  $\pm$  SE. A1AT, alpha 1 antitrypsin; camostat, camostat methylate.
